# Supplementary material
Source: Research Square preprint supplement (doi:10.21203/rs.3.rs-8810991/v1)
Supplement: Supplementary file 1 [file b8244048c4445300fe8b4476.docx]

**Supplemental Materials, methods, figures, tables**

**Detailed Methods:**

**Mice**

Wild-type C57BL/6 mice were obtained from Taconic or Jackson Laboratory. *Muc16*-/- mutant mice in a 129 background were a gracious gift from the Department of Genetics, University of Texas M. D. Anderson Cancer Center, Houston, Texas (1). These Muc16 knockout mice were generated as follows: 6.0 kb was deleted in strain 129 that included the majority of exon 3 and a portion of intron 3 and replaced with a lacZ reporter cassette, resulting in loss of MUC16 protein expression in the homozygous *Muc16*-/- mice. PCR analysis was utilized using primers from Supplemental Table S1 to determine genotypes. A 414-bp product and an 800-bp product are amplified by the wild-type primers and the mutant primers, respectively. Mice were backcrossed to C57BL/J (Taconic) twice and F2 littermates were assessed for *Muc16-/-* mutant alleles. In addition, 129 *Muc16*-/- mice were backcrossed to C57B6 mice 5x using a high-speed congenic strategy and first-wave male germ cells with 100% B6-homozygous loci (84 markers) (2) Briefly, tail snips of progeny of each cross were tested by PCR using the primers from the table for 129 x C57/B6 crosses from Ogonuki et al (2), selecting in each case for the progeny with the largest number of B6-homozygous alleles until 100% congeneity was attained. C57/Bl/6N *card9*-/- mice were the generous gift of M. Lionakis.

*Candida albicans* strain SC5314 was obtained from American Type Culture Collection (Manassas, VA), *C. albicans*-dTomato was a kind gift of R. Wheeler, (3), and *E. coli* strain 25922 was a generous gift from the NIH clinical center microbiology laboratory (Bethesda, MD).

**Table S1 The primers used for PCR of Muc16 homozygous mutant mice in this study**

| **PCR primers list** | **Sequences** |
| --- | --- |
| Geno_F | 5'-CAGCATTTCCTATCCAATCACTAACCAG-3' |
| Geno_R | 5'-CTAGATTGTATCTGAGCTGTGGTCC-3' |
| LacZ_R | 5'-GAAACCAGGCAAAGCGCCATTCGCC-3' |

**Isolated Kidney Perfusion and Tissue Clearing**

Mouse kidney perfusions were performed as described (4) with modifications**.** Briefly, wild-type (C57BL/6 N) mice (Taconic, USA) were anesthetized using ketamine/xylazine. Mouse kidneys were perfused through the abdominal/renal artery with 10 ml of ammonium-chloride-potassium lysing buffer containing 10 unit of Heparin followed by 1ml of *C. albicans*-dTomato (a kind gift of R. Wheeler), (3) in PBS for 2 hr. Kidneys were perfused with PBS to remove unbound fungi. Excised mouse kidneys were post-fixed overnight in 4% PFA at 4 °C. After the procedure, the kidneys were processed utilizing the method of *ClearT2* tissue-clearing as described (5). Briefly, kidneys were transferred to 25% formamide/10% polyethylene glycol (PEG) solution, 50% formamide/20% PEG solution, then clear in new 50% formamide/20% PEG solution. The incubation times in each solution vary according to tissue thickness for the desired transparency as described as the original paper. After sectioning (300 μm) on a vibrating microtome, the obtained kidney slices were blocked in blocking solution (pH 7.4 PBS/10% normal donkey serum/0.1% Triton X-100) for 1 hour at room temperature. Goat anti-mouse CD31 (8ug/ml, R &D Systems, AF3628) and rabbit anti-mouse MUC16 (2 ug/ml, Abcam, ABIN1172462) were incubated in 1% BSA/1% Tween in PBS overnight at 4°C. After washes with PBST (0.1% Triton X-100 in PBS), AF488-conjugated anti-goat (Thermofisher) and AF647 conjugated anti-rabbit secondary antibodies (ThermoFisher, A-21245) were applied, incubated in 1%BSA/1%Tween/PBS overnight at 4°C. 4’6-diamindino-2-phenylindole (DAPI, Millipore Sigma D9542-1mg) was used for nuclear staining followed by washes in phosphate-buffered saline before imaging on an inverted SP8 microscope (Leica Microsystems) using a 20x 0.75NA 680 µm working distance lens.

**Isolation of mouse primary kidney endothelial cells**

Mouse tissue endothelial cells were isolated as described (6) with some modification. Briefly, mouse kidneys were aseptically removed washed with DMEM/F12 buffer (MilliporeSigma, D6421) and the capsules of kidney were carefully removed from the underlying tissue with scissors to preclude contamination by exogenous epithelial cells. The kidneys were dissected, finely minced and washed with DMEM/F12. The tissue was then digested with Liberase (TM Research Grade Enzyme, # 5401119001, Millipore Sigma) at a final concentration of 100 μg /ml at 37°C with agitation for 25-35 min. The suspensions were filtered on 100- µm strainer to discard large fragments followed by a second filtration on 70 µm. The second filtrates were centrifuged at 300*g* for 10 minutes and the pellets washed three times in phosphate buffer saline (PBS) containing 0.5% bovine serum albumin (BSA) and 2 mM ethylenediamine-tetraacetic acid (EDTA). The final pellets were resuspended in 90 µl of PBS with 0.1% BSA and 2 mM EDTA per 106 cells. Endothelial cell purifications were performed using CD146 MicroBeads positive selection kit according to the manufacturer’s instructions (Milteny Biotec, 130-092-007). Isolated cells were plated onto T25 flasks precoated with 1% gelatin and cultured at 370 C in a 5% CO2 in DMEM/F12 containing endothelial cell growth supplements (American type culture collection: ATCC PCS-100-030, Endothelial Cell Growth Kit-VEGF). The cells were cultured for 48 h, washed with DMEM/F12 to remove nonadherent cells, and fresh growth medium was added. After 1 week, cells grew out as typical "cobblestone" colonies and exhibited monolayer growth and contact inhibition (Fig. S1A, left panel). To verify the cell preparation, cells were tested for uptake of Dil-Ac-LDL according to the method of Voyta (7), and cells were also stained with anti-CD45-PE-Cy7A, CD146 PE-A and Muc16 APC-A (Table S2) and subjected to flow cytometry.

In addition, mouse kidney ECs demonstrated induction of E-selectin and VCAM-1 with *C. albicans* as described (8, 9) as well as the endothelial marker, CD31/PECAM-1 (10). Briefly, 106 confluent mouse kidney ECs were incubated with 5x105 *C. albicans* for 8h, washed extensively, then mRNA was subjected to qRT-PCR using primers in Table S3.

**Table S3: Primers for qRT_PCR of endothelial-specific markers**

***Table S2: Antibodies for endothelial cells isolation and IHC staining***

| **Name** | **Catalog #** | **Primary Ab** | **Secondary Ab** |
| --- | --- | --- | --- |
| CD45 | 25-0451-82 | PE-Cy7 conjugated |  |
| CD31 | AF3628 | Polyclonal Goat IgG | AF488 anti goat Ig G  Cat# A-11055 |
| CD31 (PECAM-1) | 12-0311-82 | PE conjugated |  |
| CD146 | 12-1469-42 | PE conjugated |  |
| Muc16 | ABIN6994177 | Rabbit anti mouse Muc16 | Rb IgG of Zenon AF647  (Z-25308) |
| Muc16 | ABIN6994177 | Rabbit anti mouse Muc16 | Rb IgG of Zenon AF488  (Z25302) |
| *Candida* | ab53891, ab15007 | Rabbit anti *C. albican* | Goat anti rabbit AF488  (SA5-10386-AF488) |
| Candida/tomato | Gift from M. Lionakis |  |  |

**Table S3: Endothelial Cell-Specific Primers**

| **Name** | **Sequences Fwd**  **(5’ to 3’)** | **Sequences Rvs**  **(5’ to 3’)** |
| --- | --- | --- |
| ***ACTb*** | GGCTGTATTCCCCTCCATCG | CCAGTTGGTAACAATGCC ATGT |
| ***GAPDH*** | GTCGGTGTGAACGGATTTG | TAGACTCCACGACATACTCAGCA |
| ***ICAM-1*** | CAATTTCTCATGCCGCACAG | AGCTGGAAGATCGAAAGTCCG |
| ***ICAM-2*** | ACGGTCTCAACTTTTCCTGCC | TGCATCGGCTCATAGACTTCAA |
| ***VCAM-1*** | TGAACCCAAACAGAGGCAGAGT | GGTATCCCATCACTTGAGCAGG |
| ***PECAM-1*** | CAAACAGAAACCCGTGGAGATG | ACCGTAATGGCTGTTGGCTTC |
| ***N-Cadherin*** | TAGACGAGAGGCCTATCCATGC | CAGCAGCTTTAAGGCCCTCAT |
| ***E-Selectin*** | AGCAGAGTTTCACGTTGCAGG | TGGCGCAGATAAGGCTTCA |
| ***vWF*** | TGTTCATCAAATGGTGGGCAGC | ACAGACGCCATCTCCAGATTCA |

**Gene silencing of renal endothelial-associated mucins in mouse endothelial cells**

Gene silencing was performed using four siRNA plasmids (Table S4) targeting the mouse Muc genes *Muc1*, *Muc13*, *Muc14*, *Muc16* using proprietary mixtures or the Accell Non-targeting Control Pool (D-001910-10-05, Dharmacon). Purified endothelial cells were transfected with endotoxin-free siRNA plasmids using transfection reagent as described by the manufacturer (Dharmacon, protocol of Dharmacon™ Accell™siRNA delivery). Transiently transfected cells were assayed 72 h post-transfection. MUC16 knockdown was quantified using real-time RT-PCR.

Total RNA was extracted from cells using RNeasy Mini Kit (Qiagen, #74104) and cDNA was synthesized using iScript cDNA Synthesis Kit (BIO-RAD, #1708891) according to the protocols of the manufacturer. Quantitative real-time PCR (qRT-PCR) was performed on the BIO-RAD CFX96 System using SsoAdvanced Universal Probes Supermix (Bio-Rad, #1725281), MUC16-specific and GAPDH-specific primer sets (Themofisher Scientific). The level of MUC16 mRNA expression was normalized to glyceraldehyde-3-phosphate dehydrogenase (GADPH) expression by the comparative CT method (ΔΔCt) and expressed as MUC16/GAPDH ratio. MUC16 knockdown was calculated relative to control siRNA-transfected cells. Knockdown efficiencies were deterimined using qRT-PCR primers using proprietary mixtures (Muc16: ID Mm01177118_m1 (Catalog # 4331182, ThermoFisher Scientific, mouse); Muc1: ID Mm00449604_m1 (Catalog # 4331182, ThermoFisher Scientific, mouse; Muc13: ID Mm00495397_m1 (Catalog # 4331182, ThermoFisher Scientific, mouse; Muc14: (Emcn), ID Mm00497495_m1 (Catalog # 4331182, ThermoFisher Scientific, mouse). ⩾70% Reductions vs non-targeted controls were regarded as significant.

**Adherence Assays of *Candida* to primary mouse kidney endothelial cells**

The method of Phan et al was utilized (11). Briefly, 105 mouse purified endothelial cells were cultured in 6-well tissue culture plate until cells reached confluence. Studies were restricted to confluent endothelial monolayers to minimize artifacts caused by the binding of *Candida* directly to plastic surfaces. To determine *Candida* adherence, we washed endothelial monolayers twice with 2 ml of PBS, and 1 ml of the singlet *Candida* suspension (102 cfu/ml of Hank’s balanced salt solution, HBSS was added to replicate monolayers. The inoculum size of each suspension was confirmed by culturing aliquots in YPD agar plates. Following a 2h incubation at 37°C, the nonadherent organisms were aspirated and the endothelial cell monolayers were rinsed with 10 ml of HBSS in a standard manner. Two milliliters of warm 2% glucose, 2% bactopeptone, 1% yeast extract agar (YPD) agar was poured over the surface and allowed to solidify. After incubation at 37°C for 24 h, colonies (representing adherent organisms) were counted, and the results were expressed as a percentage of the inoculum.

Purified mouse kidney ECs were treated with glycolytic enzymes by the method of (12). Briefly, both neuraminidase (NEB P0720, New England Biolabs) and β-1.4 Galactosidase (NEB P0745, New England Biolabs) were prepared in HBSS supplemented with 4 mM [Ca2+] final concentration according to the manufacturer’s directins. ECs were washed twice with HBSS, following which neuraminidase solutions (250U/8U) were added and incubated 1h at 37°C, then cells were washed twice with HBSS before *C. albicans* (SC5314) binding.

**Measurement of endocytoses of *C. albicans* by ECs.**

The number of organisms endocytosed by ECs was determined using the method of a previously described differential fluorescence assay (11). Briefly, ECs were grown to confluency on fibronectin-coated glass coverslips in a 24-well tissue culture plate (BD Biosciences). The cells were rinsed once with warm HBSS and infected with 105 cells of *C. albicans* in RPMI 1640 medium for 45 min at 37 °C in 5% CO2. Next, the cells were rinsed twice with 0.5 ml of HBSS in a standardized manner and then fixed with 3% paraformaldehyde. The adherent but non-endocytosed organisms were labeled with polyclonal rabbit anti-*C. albicans* antibodies (Biodesign International #B65411R) that had been conjugated with red fluorescing Alexa 568 (Molecular Probes). The endothelial cells or CHO cells then were permeabilized with 0.5% Triton X-100 (Sigma) in PBS, after which both the endocytosed and non-endocytosed organisms were labeled with polyclonal anti-*C. albicans* antibodies conjugated with red fluorescing Alexa 488 (Molecular Probes). The coverslips were viewed by epifluorescence, and at least 100 organisms/slide were examined. The number of cell-associated organisms (endocytosed plus adherent organisms) was determined by counting the number of organisms that were labeled with green fluorescencing Alexa 488. The number of endocytosed organisms was determined by subtracting the number of organisms labeled with red fluorescencing Alexa 568 from the number of cell-associated organisms. The results were expressed as the number of endocytosed or cell-associated organisms per high-powered field. An organism was considered to be endocytosed if any portion of it was internalized.

**Proximity Ligation Assay.**

The method of Soderberg et al (13) was adapted using the commercial Duolink reagents (Millepore Sigma/Merck KGaA, Darmstadt Germany). Briefly, Purified mouse endothelial cells were grown to 70-80% confluence on 12-well culture slides (ibidi) in 200 μl of (what media, company) culture media at 37 °C, with 5% CO2. The cells were rinsed once and 5x104 hyphae of *C. albicans* SC5314 were incubated for 2 hours with endothelial cell monolayers in DMEM/F12 medium alone. Cells were rinsed twice with PBS and then fixed with 100 ul 1xBD cytofix/cytoperm (BD Biosciences, #554722) for 15 min at room temperature. For primary antibody incubation, the cells were treated with 10 mg of primary antibodies respectively for 2-3 hours in 3 groups: 1) rabbit anti-MUC16 antibody (Antibody online, ABIN6994177, 10mg/well) and mouse anti-Als3 antibody described previously (14) (a generous gift from L Hoyer). 2) Rabbit anti N-cadherin polyclonal Antibody (ThermoFisher, PA5-19486) and mouse anti-Als3 antibody. 3) rabbit anti-MUC16 antibody and mouse anti-N-cadherin monoclonal antibody (Thermofisher, MA1-2002, 8C11). (Note: Pilot testing verified equal density of staining on western blots of protein extracts using the N-cadherin polyclonal vs monoclonal antibodies). Subsequently, probe incubation, ligation, and amplification were performed according to the manufacturer's operating procedures. Puncta were captured by fluorescent (FITC) microscopy using Imaris Software.

**Comparison of human and mouse *MUC16* and expression and fungal binding of recombinant huSEA domains:**

Human MUC16 is a 14,507 aa protein, with 57.2% identity to the mouse MUC16 having 8792 aa in the putative polypeptide sequence (NCBI XP_011240938.1). Examination of the respective proteins identified 14 SEA domains in the human protein having 36-100% identity to the first domain (aa 6631-6419) and 17 consensus SEA domains in the mouse, with 75%-45% identity between the human domain and each respective mouse domain with demonstration of similarity by Clustal-Omega (see Fig. S2a, 21).

Recombinant SEA domains were expressed as a synthetic gene comprising 8 human SEA domains (aa 8682-8805; Fig. S2b) (GenScript, Piscataway, NJ), as a fusion protein with maltose-binding protein (MBP) by using the pIH902 expression system (New England Biolabs, Beverly MA) purified as a 145-kDa protein (Fig. S2c) using amylose-Sepharose according the manufacture’s directions. Alternatively, a single SEA domain of the same region was expressed with either an N-terminal or C-terminal MBP which purified as 59-kDa bands after affinity purification using the same methods. Intact sequence was verified by Sanger sequencing prior to use.

SEA domain binding to *C. albicans* was performed as follows: d-Tomato-expressing *C. albicans* described above was induced for hyphal formation by incubation for 1 h in RPMI at 37C followed by incubation of 103 CFU with 100 mg/ml of rSEA-MBP or the same amount of MBP alone for 2 h at 37C followed by extensive washing and incubation with anti-MBP antibody (Table S2) and visualized by epifluorescence or by flow cytometry.

**Isolated Kidney Perfusion and Tissue Clearing**

Mouse kidney perfusions were performed as described (4) with modifications**.** Briefly, wild-type (C57BL/6 N) mice (Taconic, USA) were anesthetized using ketamine/xylazine. Mouse kidneys were perfused through the abdominal/renal artery with 10 ml of ammonium-chloride-potassium lysing buffer containing 10 unit of heparin followed by 1ml of 106 CFU/ml of *C. albicans*-dTomato in PBS. After 2 h kidneys were perfused with PBS to remove unbound fungi. Excised mouse kidneys were post-fixed overnight in 4% PFA at 4 °C. After the procedure, the kidneys were processed utilizing the method of *ClearT2* tissue-clearing as described (5). Briefly, kidneys were transferred to 25% formamide/10% polyethylene glycol (PEG) solution, 50% formamide/20% PEG solution, then clear in new 50% formamide/20% PEG solution. The incubation times in each solution vary according to tissue thickness for the desired transparency as described as the original paper. After sectioning (300 μm) on a vibrating microtome, the obtained kidney slices were blocked in blocking solution (pH 7.4 PBS/10% normal donkey serum/0.1% Triton X-100) for 1 hour at room temperature. Goat anti-mouse CD31 (8ug/ml, R & D Systems, AF3628) and rabbit anti-mouse MUC16 (2 ug/ml, Antibody online, ABIN6994177) were incubated in 1% BSA/1% Tween in PBS overnight at 4°C. After washes with PBST (0.1% Triton X-100 in PBS), company, AF488 conjugated anti-goat and AF647 conjugated anti-rabbit secondary antibodies were applied, incubated in 1%BSA/1%Tween/PBS overnight at 4°C. DAPI was used for nuclear staining followed by washes in phosphate-buffered saline before epifluorescent imaging on an inverted SP8 microscope (Leica Microsystems) using a 20x 0.75NA 680 µm working distance lens.

**Mouse model of systemic candidiasis and oropharyngeal candidiasis (OPC)**

*Candida albicans* strain SC5314 was used for systemic or OPC infection in this study. For the OPC model of infection, the model of Huang et al was utilized (15). Briefly, *C. albicans* yeast was grown overnight in YPD media with chloramphenicol in a shaking incubator at 30°C. To prepare *C. albicans* for infection, the yeast was centrifuged, washed in PBS, and counted using a hemocytometer. Yeast was then diluted to 108/ml in sterile PBS. The mice are inoculated by placing a calcium alginate swab saturated with *C. albicans* blastospores sublingually for 75 min while the mice were anesthetized with ketamine and xylazine, as described (16) and observed for weight loss. For intravenous infections, mice were infected with 2.5 × 105 *C. albicans* yeast cells via the lateral tail vein and observed for morbundity.

**Determination of Fungal Burden**

Infected mice were euthanized without infection and at and 1, 4, and 7 days after infection to determine the fungal burden in the kidney, brain, spleen, and liver. The organs were aseptically removed, weighed, homogenized in PBS, serially diluted, and plated in duplicate on YPD agar plates containing 50 mg/L chloramphenicol. Colony-forming units (CFUs) were determined after 48 h of incubation at 37 ° C and results were expressed as CFUs/g tissue.

**Histopathological and immunohistochemistry (IHC) for N-cadherin and Muc16 expression Studies**

The method of Lionakis et al was adapted (17). Briefly, control uninfected mice and infected mice were euthanized on days 1, 4, and 7 after infection and the kidney was removed, fixed with 10% formalin. The samples were sent to HistoServ Inc. (Germantown, MD 20874 USA) for sectioning and H&E or PAS staining. For IHC of N-cadherin and MUC16 expression, tissue sections were placed on poly- L -lysine-coated glass slides, deparaffinized in xylene and rehydrated in a graded series of alcohol. Following antigen retrieval in citrate buffer (PH6.0) for 20 min at 85 ° C, endogenous peroxidase was blocked by alcohol containing 0.3% hydrogen peroxide for 10 min at room temperature (RT). The slides were incubated with 5% bovine serum albumin (BSA; Sigma-Aldrich, St. Louis, Mo., USA) for 20 min to block nonspecific protein binding sites. After washing with Tris-buffered saline containing 0.05% Tween 20, sheep anti-N-Cadherin antibody (1:400, R&D, AF6426) or Rabbit anti-CA-125(MUC16) antibody (1:20, Antibody online, ABIN6994177) primary antibody was added in 1% BSA, and slides were incubated overnight at RT. BSA (1%) without primary antibody was used as negative control. The slides were then washed twice with Tris-buffered saline containing 0.05% Tween 20, and detection of immunoreaction was achieved using the streptavidin-HRP (horse radish peroxidase) system (Dako) containing the streptavidin-peroxidase complex after a 40-min incubation at RT. Color was developed with DAB 3 DAB (3,3'-diaminobenzidine tetrahydrochloride) substrate kit (Thermofisher, 34002) and slides were subsequently counterstained with hematoxylin, dehydrated, and mounted. Two different sections of each model were tested per experiment.

**Flow cytometry**

Control uninfected mice and infected mice were euthanized on days 1, 4, and 7 after infection. Then, the animals were perfused with normal saline and brain, spleen, liver and kidneys were harvested. Single-cell suspensions were obtained using methods previously described by Lionakis (17). Briefly, brains were collected in 7 ml of FACS buffer (PBS + 0.5% BSA + 0.1% NaN3) and homogenized using the plunger portion of a 12-ml syringe in a Petri dish at 4 ° C. The suspension was brought to 10 ml by adding 3 ml of 90% Percoll (Sigma-Aldrich, [GE17-0891-01](https://www.sigmaaldrich.com/US/en/product/sigma/ge17089101)) in PBS. Then, the suspension was underlaid with 1 ml of 70% Percoll and centrifuged at 2,450 rpm for 20 min without break. The leukocytes at the interphase were isolated, washed three times in FACS buffer, suspended in PBS, and passed through a 40- µm filter. Spleens were finely minced and digested at 37 ° C in digestion solution (RPMI 1640 with 20 mM HEPES without serum) containing 100 μg /ml of Liberase (TM Research Grade Enzyme, 5401119001, Millipore Sigma) and 300 U/ml of grade II DNAse I (Roche) for 20 min with intermittent shaking. Digested tissue was passed through a 100- µm filter, washed, and the remaining red cells were lysed with ACK lysing buffer (Lonza, Walkersville, Md., USA) for 30 s. Then, cells were passed through a 70- µm filter and washed three times with FACS buffer. Finally, splenocytes were suspended in PBS and passed through a 40- µm filter. To obtain kidney and liver single-cell suspensions, the organs were finely minced and digested at 37 ° C in digestion solution containing 100 μg /ml of Liberase (TM Research Grade Enzyme, 5401119001, Millipore Sigma) and 300 U/ml of grade II DNAse I (Roche) for 20 to 35 min with intermittent shaking. Digested tissue was passed through a 70- µm filter, washed, and the remaining red cells were lysed with ACK lysing buffer for 30 s. Then, the cells were passed through a 40- µm filter, washed, and suspended in 8 ml of 40% Percoll. The suspension was overlaid on 3 ml of 70% Percoll and centrifuged at 2,000 rpm for 30 min at RT. The leukocytes at the interphase were isolated, washed three times in FACS buffer, suspended in PBS, and passed through a 40- µm filter. From kidney, brain, spleen, and liver single-cell suspensions, 500 µl each were stained with a Live/Dead fluorescent dye (Invitrogen, Carlsbad, Calif., USA) for 10 min (1: 500) and then incubated with rat anti-mouse CD16/32 (2.4G2; BD Biosciences) for 10 min (1: 100) at 4 ° C to block Fc receptors. Then, cells were incubated at 4 ° C for 30 min with the following antibodies: FITC-conjugated anti-mouse CD45 (eBioscience, 11-0452-82), BV711-conjugated Ly6G (eBioscience, 67-9668-82), SB436-conjugated MHC II (62-5321-82 eBioscience), PE-conjugated anti-mouse F4/80 (eBioscience, 12-4801-82) and PE-Cy7-conjugated anti-mouse Ly6C (eBioscience, 25-5932-82). After three washes with FACS buffer, cells were fixed with 2% paraformaldehyde. FACS was performed on an BD Fortessa (BD Biosciences) and data were analyzed using FlowJo software. Additional antibodies are listed in Table S4.

**Table S4: Flow Cytometry for WBC**

| **Name** | **Dye** | **Catalog#** | **Provider** |
| --- | --- | --- | --- |
| CD45 | FITC | 11-0452-82 | Thermofisher Scientific |
| Ly6G | BV711 | 67-9668-82 | Thermofisher Scientific |
| CD11b | BV605 (SB600) | 63-0112-82 | Thermofisher Scientific |
| MHCII | SB436 (BV421) | 62-5321-82 | Thermofisher Scientific |
| CD11C | APC | 17-0114-82 | Thermofisher Scientific |
| Ly6C | PE-C7 | 25-5932-82 | Thermofisher Scientific |
| F4/80 | PE | 12-4801-82 | Thermofisher Scientific |
| Live/Dead blue | UV | L23105 | Invitrogen |

**Induction of *Muc16* in intact mice and in purified mouse kidney ECs.**

For *Candida* induction of *Muc16* in intact mice, C57/Bl/6 mice were inoculated intravenously with 2.5 x 105 *C. albicans*, kidneys excised as described above and RNA assayed by qRT-PCR using primers described above. For *Candida* induction of *Muc16* in ECs, 2 x105 CFU of *C. albicans* was incubated with 106 ECs for 8 h in cell culture media and RNA assayed for *Muc16* expression by qRT-PCR. For *E. coli* induction of *Muc16* in ECs, *E. coli* strain 25922 (106 CFU) were heat treated (65 C for 1h) and indicated equivalent amount of organism lysate dilution (0.01-100 organisms equivalent) incubated with 106 of ECs and RNA assessed for *Muc16* expression as above. For PAMP ligand induction, Pam3CSK4, heat killed Listeria monocytogenes (HKLM), Poly (I:C), lipopolysaccharide (LPS), fibroblast-stimulating lipopeptide (FSL), CpG oligodeoxynucleotide (ODN), trehalose dibehenate (TDB), FurFurman, Laminarin, Poly IC-LMW, bacterial flagellin (FLA) or single stranded RNA40 (ssRNA40) (See Table S5) were incubated with EC from either C57/Bl/6N or littermate C57/Bl/6N *card9*-/- mice according to the manufacturer’s instructions for either 1 h or 3 h and RNA isolated and assayed for *MUC16* expression by qRT-PCR as above.

**Table S5: PAMP ligands used**

| **Toll-like receptor** | **agonist** | **Catalog number (invivogen)** |
| --- | --- | --- |
| TLR1/2 | Pam3CSK4 | #tlrl-pms |
| TLR2 | LAM-MS | #tlrl-lam |
| TLR3 | Poly(I:C)-HMW | #tlrl-kit1 |
| TLR4 | LPS-EK | #tlrl-kit1 |
| TLR3 | Poly(I:C)-LMW | #tlrl-kit1 |
| TLR6/2 | FSL-1 | #tlrl-kit1 |
| TLR9 | ODN1826 | #trlr-1826 |
| Minkle | TDB | #trlr-tdb |
| Dectin2 | Furfurman | #tlrl-ffm |
| Dectin1 | Laminarin | #tlrl-lam |
| TLR5 | FLA-ST | #tlrl-kit1 |
| TLR7 | ssRNA40 | #tlrl-kit1 |

**CRISPR Cas9 mediated T10155I KI of *MUC16* in HMEC1 cells.**

To generate cells, ribonucleoproteins containing Cas9 protein and synthetically chemically modified sgRNA produced by the manufacturer (Synthego, Redwood City, CA) was electroporated into HMEC1 cells (American Type Culture collection: CRL-3243). Guide RNA sequence was: 5’-CCTGTGGTCTCAAAATTAGC-3’ and Donor sequence: 5’-TCTTCCATGGCTGAAACCTCTATTTCCACATCAATGCC

TGCcAATTTTGAGACCAtAGGATTTGAGGCTGAGCCATTTTCTCATTTGACTTCTGGATTTAGGAAGACAAAC-3’. Guide RNA cut location was chr19:8,946,320. Editing efficiency was assessed upon recovery, 48 h post electroporation. Genomic DNA was extracted from a portion of the cells, PCR amplified using primers: 5’-GGTTATCCCAGTGGACTCCG-3’ and 5’-TTCAAGCATGGCAGTGACCA-3’ and subjected to Sanger sequencing. The pool was subjected to repetitive dilutional cloning and clones screened for the appropriate KI using the above PCR primers and Sanger sequencing and equivalent growth rates and confluent monolayer productions to that of the wild-type cells.

**Single cell cloning:**

Single cell clonogenic assays were performed as described (18). Briefly, cells were trypsinized, transferred to flow cytometry tubes containing standard culture media (MCDB131- 10 ng/ml EGF, 1 ug/ml Hydrocortisone, 10 mM Glutamine and 10% FBS) at 5 x 105 cells/tube. Cells were typically seeded at single cell density on four 96-well plates containing 200 L/well of complete media (MCDB131- 10 ng/ml EGF, 1 ug/ml Hydrocortisone, 10 mM Glutamine and 10% fetal bovine serum using a BD FACS Aria II flow cytometer. Cells were incubated at 37˚C with 5% CO2-room air for 14 days without media change. Media was checked on the wells, and if needed, media was added on the 14th day. On the 14th day, each well was examined by using Celigo S (Nexcelom Bioscience) to assess colony size. Then, cell colonies were isolated, gently trypsinized, transferred to 24-well plates and expanded. At ~90% confluency, cells were transferred to T25 flasks for maintenance culture.

**Ethics Statement**

The human prospective observational cohort studies were approved by the institutional review board each institution (Cohort 1, The University of Illinois at Chicago and Cohort 2, Duke University Health System). All subjects or their legally authorized representatives provided written informed consent, or had a waiver as approved by the IRB.

**Study Design and Participants**

The UIC candidemia discovery study (Cohort I) was a prospective, observational study involving non-neutropenic patients admitted to UIC over a three-year period and developed *Candida* blood stream infections reported by the UIC clinical laboratory. Inclusion and Exclusion criteria are described in Table S6. Demographic data are given in Table S7. Patients were evaluated within 3 days by a member of the infectious disease consult service, APACHE II score, co-morbidities and ethnic groups determined and therapy optimized including central line removal. Pts were then followed for 30 days and mortality noted. Cohort II: Infected adults (≥18 years of age) were identified by report of ≥1 positive blood cultures for *Candida* species in the clinical microbiology laboratory at the participating center. Plasma, serum, and whole blood specimens were obtained in combination with routine blood draws at baseline and during a 12-week follow-up period. Blood cultures were drawn as part of routine care until clearance of fungemia was documented or death occurred. For genetic analysis, DNA was isolated from whole blood by standard procedures. All-cause mortality was determined based on hospital records and, if necessary for DUMC subjects, the Social Security Death Index. All infected patients were followed for up to 12 weeks to assess for clinical outcome.

**Identification of *MUC16* polymorphisms in Cohort I candidemia patients.** DNA collected at entry was genotyped. Forty non-synonymous alleles (Table S8) were identified from the GnomAD database (19), and assessed using Taqman (ThermoFisher, Waltham, MA) and Sequenom (San Diego, CA) platforms according to the manufacturer’s instructions.

**Within-case association study of mortality in Cohort II candidemia patients**

The genotyping, quality control, and imputation of the genetic data was previously described (20) Briefly, DNA was genotyped using Illumina HumanCoreExome-12 v1.0 and HumanCoreExome-24v1.0 BeadChip Snp chips. Genotypes were imputed using the human reference consortium reference panel (21) using the Michigan imputation server (22). Quality control filters resulted in a dataset of 156 candidemia patients. Of these 156 patients, 148 had available mortality data. We tested for association with mortality at 14, 30 and 90 days within the patient cohort using 31 non-survivors and 117 survivors, 49 non-survivors and 99 survivors, and 65 non-survivors and 83 survivors respectively. The association between the genetic variants and mortality were tested by Fisher’s exact test using PLINK v1.9 ([www.cog-genomics.org/plink/1.9/](http://www.cog-genomics.org/plink/1.9/)) (23).

**Table S6. Entry and Exclusion Criteria, Cohort I: Prospective Observational Genetic study of mortality in candidemia**

Entry Criteria

1. Fever > 38C
2. Candidemia, defined as the isolation of *Candida albicans* from one or more blood cultures
3. Age >/= 18 years
4. Hemoglobin >/= 9.0 gm/dL
5. ANC > 500
6. Ability for patient or patient representative to give informed consent

Entry exclusion criteria

1. AIDS
2. Bone marrow or solid organ transplant
3. Cytotoxic chemotherapy within the last 6 months
4. Prednisone > 20 mg/d in the previous 30 days
5. Therapy with anti-TNF antibodies

| Table S7. Demographic Data, Cohort I: Prospective Observational Genetic study of mortality in candidemia | | | |
| --- | --- | --- | --- |
|  | Alive at 30d  (*N*=25) | Died  (*N*=12) |
| Age (Range, Med [IQR]) | 20 to 89,  52 [41-73.5] | 35 to 78,  59.5 [53.5-71] |
| APACHE II  (Range, Med [IQR]) | 4 to 33,  16 [13-27.5] | 13 to 38,  21 [15-29.25] |
| ICU | 15, 60% | 9, 75% |
| Vent | 9, 36% | 7, 58.3% |
| Gender (n, % Male) | 11, 44% | 6, 50% |
| Race/Ethnicity (n, % Caucasian) | 9, 36% | 2, 16.7% |
| Heme malig (n) | 0 | 1 |
| Solid Tumor (n) | 8, 32% | 7, 58.3% |
| Solid organ transplant | 4,16% | 1,8.3% |
| Immunosuppressants | 8,32% | 2, 16.7% |
| Low dose corticosteroids | 3, 12% | 1, 8.3% |
| High dose corticosteroids | 4, 16% | 1, 8.3% |
| Dialysis | 6, 24% | 3, 25% |
| Surgery within 30 days | 9, 36% | 2, 16.6 |
| Chemotherapy | 3,12% | 4, 33.3% |
| Antibiotics | 23, 92% | 12, 100% |
| sCr 2 or greater | 10, 40% | 7, 58.3% |
| Cirrhosis | 3, 12% | 3, 25% |
| *Candida* species |  |  |
| *albicans* | 13, 52% | 4, 33.3% |
| *glabrata* | 5, 20% | 6, 50% |
| *tropicalis* | 4 | 2 |
| *parapsilosis* | 2 | 0 |
| *krusei* | 0 | 0 |
| other | 1 | 0 |
| Fluconazole susceptibility |  |  |
| S | 21,84% | 6, 50% |
| SDD | 1, 4% | 4, 33.3% |
| R | 3, 12% | 2, 16.6% |
| Initial antifungal |  |  |
| Fluconazole | 15, 60% | 2, 16.6% |
| Echinocandin | 9, 36% | 9, 75% |
| Voriconazole | 0 | 1 |
|  |  |  |
| *Note*: BDI WNL ≤ 13; BAI WNL ≤ 7. | | | |
| **p*-values are based on independent samples t-tests for continuous variables and *x2*analyses for categorical variables. | | | |

**Table S8, Non-synonymous SNPs of MUC16 analyzed**

| **CHR** | **SNP** | **BP** | **A1** | **N** | **OR** | **STAT** | **P** |
| --- | --- | --- | --- | --- | --- | --- | --- |
| 19 | rs62118938 | 8969344 | A | 37 | 7.40E+09 | 0.000932 | 0.9993 |
| 19 | rs3764556 | 8987218 | T | 37 | 1.164 | 0.2694 | 0.7876 |
| 19 | rs28501217 | 8993008 | C | 35 | 1.345 | 0.1892 | 0.8499 |
| 19 | rs11085776 | 9003618 | C | 37 | 0.7977 | -0.4296 | 0.6675 |
| 19 | rs11085777 | 9003645 | A | 37 | 0.6885 | -0.5696 | 0.5689 |
| 19 | rs12981679 | 9019605 | C | 37 | 1.465 | 0.5472 | 0.5842 |
| 19 | rs61746392 | 9045968 | C | 37 | 2.03E-09 | -0.00082 | 0.9993 |
| 19 | rs10410169 | 9047267 | T | 37 | 1.153 | 0.2096 | 0.834 |
| 19 | rs10417358 | 9048035 | C | 32 | 1.237 | 0.312 | 0.7551 |
| 19 | rs12461007 | 9049149 | A | 37 | 1.243 | 0.3519 | 0.7249 |
| 19 | rs61738391 | 9049322 | A | 37 | 1.047 | 0.03347 | 0.9733 |
| 19 | rs10410136 | 9056941 | G | 32 | 1.293 | 0.4169 | 0.6768 |
| 19 | rs11670318 | 9056982 | A | 36 | 0.2496 | -1.775 | 0.07584 |
| 19 | rs4804381 | 9056989 | G | 37 | 1.139 | 0.1253 | 0.9003 |
| 19 | rs1423051 | 9057408 | A | 35 | 8.036 | 1.757 | 0.07897 |
| 19 | rs1895364 | 9057687 | A | 36 | 4.403 | 1.905 | 0.05674 |
| 19 | rs2216662 | 9057721 | T | 37 | 0.3633 | -1.565 | 0.1175 |
| 19 | rs12982113 | 9057750 | A | 37 | 1.502 | 0.6493 | 0.5161 |
| 19 | rs12984471 | 9057896 | C | 37 | 1.441 | 0.5375 | 0.5909 |
| 19 | rs11878666 | 9058624 | A | 34 | 0.9555 | -0.0432 | 0.9655 |
| 19 | rs61995681 | 9058888 | T | 37 | 2.147 | 0.4854 | 0.6274 |
| 19 | rs1833778 | 9058942 | T | 36 | 0.7239 | -0.5704 | 0.5684 |
| 19 | rs12710265 | 9059232 | C | 37 | 1.015 | 0.02204 | 0.9824 |
| 19 | rs12461695 | 9059307 | T | 37 | 0.4633 | -0.7939 | 0.4272 |
| 19 | rs28442218 | 9059415 | C | 37 | 2.03E-09 | -0.00082 | 0.9993 |
| 19 | rs7508222 | 9059808 | A | 37 | 4.619 | 1.967 | 0.04923 |
| 19 | rs12977368 | 9060059 | C | 35 | 0.8842 | -0.177 | 0.8595 |
| 19 | rs11882256 | 9060541 | T | 37 | 0.6315 | -0.7002 | 0.4838 |
| 19 | rs59168469 | 9060915 | T | 36 | 2.01E+09 | 0.000879 | 0.9993 |
| 19 | rs56971020 | 9061797 | A | 37 | 1.03E-09 | -0.00124 | 0.999 |
| 19 | rs12978757 | 9062415 | G | 36 | 0.6667 | -0.6612 | 0.5085 |
| 19 | rs62118307 | 9065203 | C | 37 | 0.2435 | -1.465 | 0.1429 |
| 19 | rs1867691 | 9065632 | C | 37 | 0.4479 | -1.038 | 0.2994 |
| 19 | rs73495751 | 9066132 | A | 37 | 0.4174 | -0.673 | 0.5009 |
| 19 | rs17000770 | 9066259 | C | 34 | 0.4765 | -1.086 | 0.2777 |
| 19 | rs11667414 | 9066390 | A | 37 | 2.973 | 0.6923 | 0.4887 |
| 19 | rs28752016 | 9066759 | T | 37 | 8.24E-09 | -0.0015 | 0.9988 |
| 19 | rs61750932 | 9068364 | A | 37 | 1.96E-09 | -0.00082 | 0.9993 |
| 19 | rs7250080 | 9068530 | T | 37 | 0.3928 | -1.049 | 0.2941 |
| 19 | rs1862458 | 9069792 | A | 31 | 0.7542 | -0.2219 | 0.8244 |
| 19 | rs1862460 | 9069892 | C | 36 | 0.3826 | -1.006 | 0.3146 |
| 19 | rs1344572 | 9070194 | A | 37 | 4.988 | 1.095 | 0.2735 |
| 19 | rs1559172 | 9070225 | G | 35 | 2.711 | 1.55 | 0.1212 |
| 19 | rs12150888 | 9070402 | T | 37 | 1.09 | 0.1451 | 0.8847 |
| 19 | rs2547067 | 9070837 | G | 37 | 2.761 | 1.569 | 0.1168 |
| 19 | rs10422567 | 9071763 | T | 36 | 2.531 | 1.417 | 0.1564 |
| 19 | rs2121133 | 9072313 | G | 37 | 0.4479 | -1.038 | 0.2994 |
| 19 | rs72486387 | 9074073 | A | 31 | 0.7542 | -0.2219 | 0.8244 |
| 19 | rs17000819 | 9075021 | A | 37 | 1.49E-09 | -0.00083 | 0.9993 |
| 19 | rs2547068 | 9075217 | A | 37 | 0.4698 | -1.14 | 0.2544 |
| 19 | rs17000836 | 9075565 | T | 37 | 0.1278 | -1.715 | 0.08639 |
| 19 | rs2547072 | 9076083 | A | 37 | 0.6773 | -0.6518 | 0.5145 |
| 19 | rs953551 | 9076278 | A | 37 | 0.6773 | -0.6518 | 0.5145 |
| 19 | rs2591594 | 9076728 | T | 37 | 0.6773 | -0.6518 | 0.5145 |
| 19 | rs2547074 | 9076858 | T | 36 | 0.6092 | -0.8097 | 0.4181 |
| 19 | rs2547075 | 9076929 | G | 36 | 0.6377 | -0.7441 | 0.4568 |
| 19 | rs2547076 | 9076950 | A | 37 | 0.6773 | -0.6518 | 0.5145 |
| 19 | rs7254941 | 9077196 | T | 37 | 5.32E-10 | -0.00255 | 0.998 |
| 19 | rs1862462 | 9077436 | A | 34 | 0.5641 | -0.928 | 0.3534 |
| 19 | rs73011014 | 9077581 | T | 37 | 1.139 | 0.1253 | 0.9003 |
| 19 | rs2591597 | 9077803 | C | 37 | 0.6773 | -0.6518 | 0.5145 |
| 19 | rs2547065 | 9080462 | G | 37 | 0.1991 | -2.109 | 0.03497 |
| 19 | rs17000871 | 9082514 | A | 37 | 0.2794 | -1.413 | 0.1576 |
| 19 | rs7245949 | 9083143 | A | 37 | 3.124 | 1.622 | 0.1047 |
| 19 | rs7245960 | 9083174 | A | 36 | 2.992 | 1.564 | 0.1179 |
| 19 | rs17000886 | 9083457 | T | 37 | 0.4192 | -0.7544 | 0.4506 |
| 19 | rs10402538 | 9083576 | T | 37 | 0.7589 | -0.2158 | 0.8292 |
| 19 | rs60106152 | 9083791 | A | 37 | 2.48 | 1.366 | 0.1719 |
| 19 | rs28595701 | 9084197 | G | 37 | 0.7589 | -0.2158 | 0.8292 |
| 19 | rs1609458 | 9084299 | C | 29 | 1.408 | 0.5181 | 0.6044 |
| 19 | rs28641623 | 9084481 | T | 36 | 0.8412 | -0.1361 | 0.8917 |
| 19 | rs10416013 | 9084747 | C | 37 | 0.7589 | -0.2158 | 0.8292 |
| 19 | rs10410933 | 9084953 | A | 37 | 0.7589 | -0.2158 | 0.8292 |
| 19 | rs11085805 | 9085004 | C | 37 | 0.4235 | -0.6867 | 0.4923 |
| 19 | rs1574479 | 9085643 | G | 35 | 0.4964 | -0.5562 | 0.578 |
| 19 | rs1108380 | 9085958 | G | 37 | 2.48 | 1.366 | 0.1719 |
| 19 | rs45611441 | 9086145 | C | 37 | 3.871 | 1.139 | 0.2546 |
| 19 | rs4520945 | 9086318 | A | 37 | 0.4192 | -0.7544 | 0.4506 |
| 19 | rs12611293 | 9087758 | A | 37 | 0.4235 | -0.6867 | 0.4923 |
| 19 | rs1596797 | 9088017 | T | 37 | 0.5057 | -0.9412 | 0.3466 |
| 19 | rs17000947 | 9088330 | A | 37 | 0.4235 | -0.6867 | 0.4923 |
| 19 | rs10411228 | 9088721 | T | 37 | 0.6489 | -0.4089 | 0.6826 |
| 19 | rs17000950 | 9088772 | C | 37 | 0.4235 | -0.6867 | 0.4923 |
| 19 | rs17000957 | 9090182 | C | 37 | 2.616 | 1.48 | 0.1388 |
| 19 | rs73495785 | 9090784 | T | 37 | 2.144 | 1.213 | 0.2251 |

**Supplemental Figure Legends**

**Figure S1: Characterization of purified primary mouse endothelial cells** A) Primary mouse kidney endothelial cells (ECs) were purified as in Methods and grown to confluence shown by bright field microscopy (BF). Uptake of acetylated LDL was demonstrated with the fluorescent probe l'-dioctadeeyl-3,3,3',3'-tetramethyl-indoearbncyanide perehlorate conjugated to Ac-LDL (Dil-Ac-LDL). The experiments were performed by following the manufacture’s instruction. Briefly, 103 ofendothelial cells in chamber slides were incubated with 10µg/ml of acetylated low-density lipoprotein (+Ac-LDL, Biomedical Technolofies Inc, BT-902) or untreated (-Ac-LDL) in DMEM containing 10% FCS for 4 hours at 370C and 4’,6-diamidino-2-phenylindole (DAPI) as counter stain and observed by fluorescence microscopy. B, C) RNA from 1 x 106 purified mouse kidney ECs incubated with 5 x 105 *Candida albicans* or untreated (Ctr) was assessed for the indicated cytokine by qRT-PCR. D) Purified mouse kidney ECs from the indicated mouse strains were subjected to flow cytometry using the indicated antibodies.

**Figure S2; SEA domain sequences and recombinant proteins.** a) Alignment of human and mouse SEA domains using Clustal Omega (24). b) Sequence of 8 SEA domains used for expression of SEA-MBP in *E. coli.* c, d, e) SDS-PAGE of indicated recombinant proteins. f, g) *C. albicans* expressing d-Tomato induced for hyphae formation was incubated with 100 mg/ml indicated SEA fusion protein or MBP alone, washed and labeled with FITC-labeled anti-MBP antibody and assessed by flow cytometry. H) SDS-PAGE of indicated recombinant proteins, i) co-immunoprecipitation of indicated bait and prey recombinant proteins and analyzed by western using anti-MBP antibody. (* indicated non-specific staining).

**Figure S3: Tissue Fungal Burden in brain, liver and spleen of *Candida*-infected WT and *muc16*-/-strains.** a) Fungal burdens from indicated tissues after *Candida* inoculation at indicated times under conditions described in Figure 4B. b) Gating strategy for indicated kidney cellular subtypes after *Candida* inoculation under conditions described in Figure 4b.

1. Cheon DJ, Wang Y, Deng JM, Lu Z, Xiao L, Chen CM, et al. CA125/MUC16 is dispensable for mouse development and reproduction. *PLoS One.* 2009;4(3):e4675.

2. Ogonuki N, Inoue K, Hirose M, Miura I, Mochida K, Sato T, et al. A high-speed congenic strategy using first-wave male germ cells. *PLoS One.* 2009;4(3):e4943.

3. Gratacap RL, Rawls JF, and Wheeler RT. Mucosal candidiasis elicits NF-kappaB activation, proinflammatory gene expression and localized neutrophilia in zebrafish. *Dis Model Mech.* 2013;6(5):1260-70.

4. Czogalla J, Schweda F, and Loffing J. The Mouse Isolated Perfused Kidney Technique. *J Vis Exp.* 2016(117).

5. Kuwajima T, Sitko AA, Bhansali P, Jurgens C, Guido W, and Mason C. ClearT: a detergent- and solvent-free clearing method for neuronal and non-neuronal tissue. *Development.* 2013;140(6):1364-8.

6. Demeule M, Labelle M, Regina A, Berthelet F, and Beliveau R. Isolation of endothelial cells from brain, lung, and kidney: expression of the multidrug resistance P-glycoprotein isoforms. *Biochem Biophys Res Commun.* 2001;281(3):827-34.

7. Voyta JC, Via DP, Butterfield CE, and Zetter BR. Identification and isolation of endothelial cells based on their increased uptake of acetylated-low density lipoprotein. *J Cell Biol.* 1984;99(6):2034-40.

8. Phan QT, Belanger PH, and Filler SG. Role of hyphal formation in interactions of Candida albicans with endothelial cells. *Infect Immun.* 2000;68(6):3485-90.

9. Filler SG, Pfunder AS, Spellberg BJ, Spellberg JP, and Edwards JE, Jr. Candida albicans stimulates cytokine production and leukocyte adhesion molecule expression by endothelial cells. *Infect Immun.* 1996;64(7):2609-17.

10. Woodfin A, Voisin MB, and Nourshargh S. PECAM-1: a multi-functional molecule in inflammation and vascular biology. *Arterioscler Thromb Vasc Biol.* 2007;27(12):2514-23.

11. Phan QT, Fratti RA, Prasadarao NV, Edwards JE, Jr., and Filler SG. N-cadherin mediates endocytosis of Candida albicans by endothelial cells. *The Journal of biological chemistry.* 2005;280(11):10455-61.

12. Sakarya S, Rifat S, Zhou J, Bannerman DD, Stamatos NM, Cross AS, et al. Mobilization of neutrophil sialidase activity desialylates the pulmonary vascular endothelial surface and increases resting neutrophil adhesion to and migration across the endothelium. *Glycobiology.* 2004;14(6):481-94.

13. Soderberg O, Gullberg M, Jarvius M, Ridderstrale K, Leuchowius KJ, Jarvius J, et al. Direct observation of individual endogenous protein complexes in situ by proximity ligation. *Nat Methods.* 2006;3(12):995-1000.

14. Coleman DA, Oh SH, Zhao X, Zhao H, Hutchins JT, Vernachio JH, et al. Monoclonal antibodies specific for Candida albicans Als3 that immunolabel fungal cells in vitro and in vivo and block adhesion to host surfaces. *J Microbiol Methods.* 2009;78(1):71-8.

15. Huang Y, Guo L, Qiu J, Chen X, Hu-Li J, Siebenlist U, et al. IL-25-responsive, lineage-negative KLRG1(hi) cells are multipotential 'inflammatory' type 2 innate lymphoid cells. *Nat Immunol.* 2015;16(2):161-9.

16. Solis NV, and Filler SG. Mouse model of oropharyngeal candidiasis. *Nat Protoc.* 2012;7(4):637-42.

17. Lionakis MS, Lim JK, Lee CC, and Murphy PM. Organ-specific innate immune responses in a mouse model of invasive candidiasis. *J Innate Immun.* 2011;3(2):180-99.

18. Alvarez DF, Huang L, King JA, ElZarrad MK, Yoder MC, and Stevens T. Lung microvascular endothelium is enriched with progenitor cells that exhibit vasculogenic capacity. *Am J Physiol Lung Cell Mol Physiol.* 2008;294(3):L419-30.

19. Karczewski KJ, Francioli LC, Tiao G, Cummings BB, Alfoldi J, Wang Q, et al. The mutational constraint spectrum quantified from variation in 141,456 humans. *Nature.* 2020;581(7809):434-43.

20. Jaeger M, Matzaraki V, Aguirre-Gamboa R, Gresnigt MS, Chu X, Johnson MD, et al. A Genome-Wide Functional Genomics Approach Identifies Susceptibility Pathways to Fungal Bloodstream Infection in Humans. *The Journal of infectious diseases.* 2019;220(5):862-72.

21. McCarthy S, Das S, Kretzschmar W, Delaneau O, Wood AR, Teumer A, et al. A reference panel of 64,976 haplotypes for genotype imputation. *Nature genetics.* 2016;48(10):1279-83.

22. Das S, Forer L, Schonherr S, Sidore C, Locke AE, Kwong A, et al. Next-generation genotype imputation service and methods. *Nature genetics.* 2016;48(10):1284-7.

23. Purcell S, Neale B, Todd-Brown K, Thomas L, Ferreira MA, Bender D, et al. PLINK: a tool set for whole-genome association and population-based linkage analyses. *Am J Hum Genet.* 2007;81(3):559-75.

24. Sievers F, Wilm A, Dineen D, Gibson TJ, Karplus K, Li W, et al. Fast, scalable generation of high-quality protein multiple sequence alignments using Clustal Omega. *Mol Syst Biol.* 2011;7:539.
